# Supplementary material
Source: ML conference proceedings conference paper supplement (https://openreview.net/forum?id=GSckuQMzBG)
Supplement: supplementary_material [file attachment]

# BRINGING NeRFs TO THE LATENT SPACE: INVERSE GRAPHICS AUTOENCODER

Anonymous authors

Paper under double-blind review

## ABSTRACT

While pre-trained image autoencoders are increasingly utilized in computer vision, the application of inverse graphics in 2D latent spaces has been under-explored. Yet, besides reducing the training and rendering complexity, applying inverse graphics in the latent space enables a valuable interoperability with other latent-based 2D methods. The major challenge is that inverse graphics cannot be directly applied to such image latent spaces because they lack an underlying 3D geometry. In this paper, we propose an Inverse Graphics Autoencoder (IG-AE) that specifically addresses this issue. To this end, we regularize an image autoencoder with 3D-geometry by aligning its latent space with jointly trained latent 3D scenes. We utilize the trained IG-AE to bring NeRFs to the latent space with a latent NeRF training pipeline, which we implement in an open-source extension of the Nerfstudio framework, thereby unlocking latent scene learning for its supported methods. We experimentally confirm that Latent NeRFs trained with IG-AE present an improved quality compared to a standard autoencoder, all while exhibiting training and rendering accelerations with respect to NeRFs trained in the image space.

## 1 INTRODUCTION

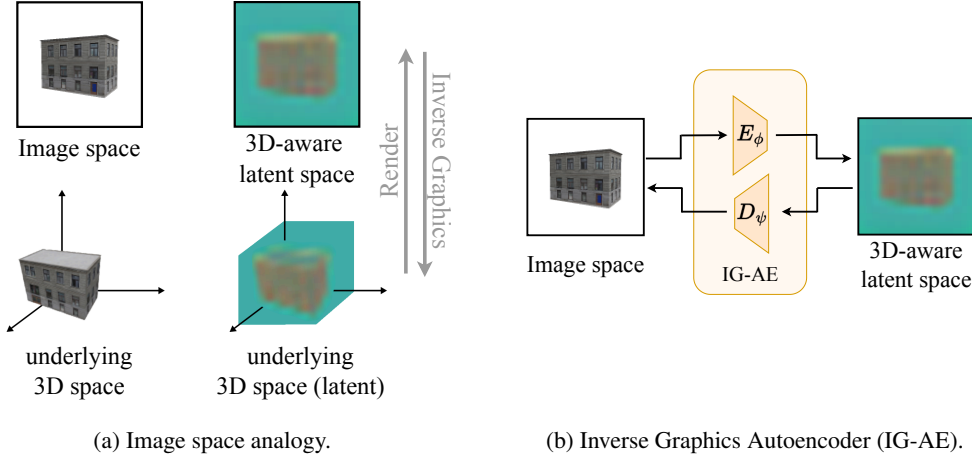

Figure 1: **3D-aware latent space.** We draw inspiration from the relationship between the 3D space and image space and introduce the concept of a 3D-aware latent space. We propose an Inverse Graphics Autoencoder (IG-AE) that encodes images into 3D-aware latent images, hence preserving 3D-consistency. We use these latents to train scene representations in the 3D-aware latent space.

Latent image representations are increasingly used in computer vision tasks. Most recent methods utilize latent representations for various tasks such as image generation (Rombach et al., 2022; Ramesh et al., 2021; Esser et al., 2021), and image segmentation (Long et al., 2015; Ohgushi et al., 2020), as they allow to represent images in a compact form which reduces their representation complexity. Nevertheless, their adoption for 3D tasks, such as Novel View Synthesis (NVS), remains limited due to the inherent incompatibilities between image latent spaces and 3D modeling methods.

These incompatibilities stem from the lack of an underlying 3D geometry in latent spaces on the one hand, and the necessity of 3D-consistency among images for solving the inverse graphics problem on the other hand. In practice, encoding two 3D-consistent views of an object does not lead to 3D-consistent latent representations; instead, it produces latent images with features that vary inconsistently across views. This prohibits the direct application of scene learning methods such as Neural Radiance Fields (Mildenhall et al., 2020, NeRF) on such representations.

Furthermore, recent methods in 3D reconstruction have attempted to enable certain applications of latent spaces for NeRFs but also encountered latent 3D-inconsistency issues induced by Autoencoders (AE). They sidestepped this issue by implementing custom, scene-dependent “adapters” (Khalid et al., 2023) or “refinement layers” (Park et al., 2024) to correct renderings of neural scene representations into standard latent image representations. However, as these adapters are scene-dependent, they only enable a limited subset of applications. Thus, a universal “3D-aware” image latent space, analogous to the 2D image space, remains an under-explored area of research with promising potential, as it would enable interoperability with latent-based 2D methods.

In this paper, we start by proposing a technique that enables learning NeRF models in the latent space. We present a training pipeline comprising two stages: **Latent Supervision** supervises NeRFs with latent image representations, and **RGB Alignment** aligns the learned latent scene with the RGB space. Yet, its application in a standard latent space results in sub-optimal latent NeRFs, due to their aforementioned incompatibilities. To address this, we draw inspiration from the relationship between the image space and 3D space (Fig. 1a) and introduce 3D-aware latent spaces, which augment regular image latent spaces by incorporating an underlying 3D geometry. We present an **Inverse Graphics Autoencoder** (IG-AE) that embeds a **3D-aware latent space** (Fig. 1b). To achieve this, we apply 3D regularization on the latent space of an autoencoder by jointly training it with a synthetic set of latent 3D scenes. During this process, we align the encoded views with the renderings of the latent 3D scenes, which enforces 3D-consistency. Additionally, we propose an autoencoder preservation process that simultaneously autoencodes real and synthetic data while performing our training, which allows us to conserve the reconstructive performance of the autoencoder.

We propose an open-source extension of Nerfstudio (Tancik et al., 2023) that enables learning its supported NeRF models in latent spaces, thereby unlocking a streamlined approach for latent NeRF learning. This enables us to evaluate various current NeRF architectures on the task of learning scenes in latent spaces. Our results highlight the effectiveness of our IG-AE in latent scene learning as compared to a standard AE. We consider this work to be the first milestone towards foundation inverse graphics autoencoders, and aspire that our open-source Nerfstudio extension promotes further research in this direction.

An overview of our contributions is given below.

- We introduce the concept of 3D-aware latent spaces that are compatible with 3D tasks,
- We present an Inverse Graphics Autoencoder (IG-AE) that maps images to a 3D-aware latent space, all while preserving autoencoder performances,
- We propose a standardized method to train NeRF architectures in latent spaces,
- We propose an open-source extension of Nerfstudio that support training supported NeRF models in the latent space, in an effort to streamline future work involving latent NeRFs.
- We experimentally show that IG-AE enables improved latent NeRF quality with respect to the baseline AE and decreased training times with respect to regular NeRFs.

## 2 RELATED WORK

**Latent NeRFs.** While NeRFs (Mildenhall et al., 2020) were originally conceived to work in the image space, they have also been extended to work in other feature spaces (Tschernezki et al., 2022; Kobayashi et al., 2022). Notably, Latent NeRFs are extensions of NeRFs to the latent spaces of image autoencoders. They have been particularly explored in works targeting applications such as scene editing (Park et al., 2024; Khalid et al., 2023) and text-to-3D generation (Metzer et al., 2023), which are not directly feasible with regular NeRFs. To circumvent the incompatibilities between NeRFs and latent spaces, these works have resorted to special adapter layers that correct NeRF renderings into standard latent image representations. For novel view synthesis, Aumentado-Armstrong et al. (2023)

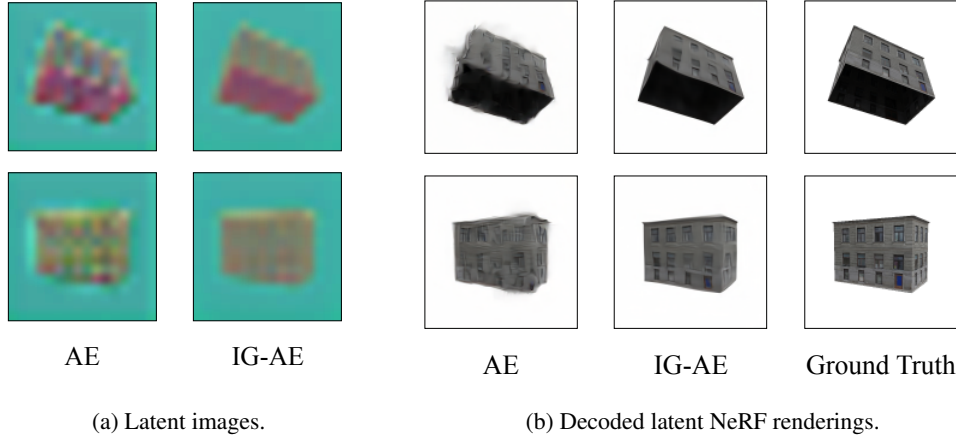

Figure 2: **Comparison of IG-AE and a standard AE.** Encoding 3D-consistent images using an AE leads to 3D-inconsistent latent images. When trained on such latents, NeRF renderings present artifacts when decoded. IG-AE presents a 3D-aware latent space with 3D-consistent latent images. Latent NeRFs trained with our IG-AE omit these artifacts and more closely match the ground truth.

employ hybrid NeRFs that are trained to simultaneously render both RGB and latent components. This is done to supervise the NeRF geometry during training, while only keeping latent components at inference, which enables good NVS performances and rendering speed-ups. In this work, we aim to train NeRFs that operate fully within the latent space. We address the incompatibility between NeRFs and latent spaces by tackling its root cause: the need for a inverse graphics autoencoders that preserves 3D consistency, or in other words, the need for 3D-aware latent spaces.

**Nerfstudio.** Subsequent to the introduction of NeRF (Mildenhall et al., 2020), a multitude of NeRF models emerged to improve upon the original architecture by accelerating training times (Müller et al., 2022; Kerbl et al., 2023), improving rendering quality (Barron et al., 2021; Chen et al., 2022), as well as targeting other limitations (Fridovich-Keil et al., 2023; Martin-Brualla et al., 2021; Yu et al., 2021). With the escalation of NeRF methods, Nerfstudio (Tancik et al., 2023) emerged as a unified PyTorch (Paszke et al., 2019) framework in which NeRF models are implemented using standardized implementations, making it straightforward for researchers and practitioners to integrate various NeRF models into their projects. Today, most well-known NeRF techniques are implemented in Nerfstudio (Müller et al., 2022; Barron et al., 2021; Mildenhall et al., 2020; Kerbl et al., 2023), thus allowing for a friction-free experience when testing and comparing novel techniques. While Nerfstudio currently provides a streamlined approach for NeRFs, it limits the representation of 3D scenes to the natural color space, hence limiting both the research and development of Latent NeRFs. In this work, we propose an open-source extension of the Nerfstudio framework that supports training any Nerfstudio architecture in a custom latent space, thus facilitating our current as well as future research in this area. Furthermore, we integrate our IG-AE into this extension, which enables us to evaluate various current NeRF architectures on the task of latent scene learning.

### 3 LATENT NERF

In this section, we start by presenting latent NeRFs. Then, we propose a general latent NeRF training method, which will later serve to train NeRFs in the latent space of our IG-AE. Provided an encoder  $E_\phi$  and decoder  $D_\psi$ , our method can train any NeRF architecture in a latent space via two stages. **Latent Supervision** is an adaptation of the standard NeRF training framework to the latent space which replaces RGB images with latent images. **RGB Alignment** fine-tunes the decoder to align the learned latent scene with the RGB space, which our experiments proved to be essential for strong NVS performances in the RGB space.

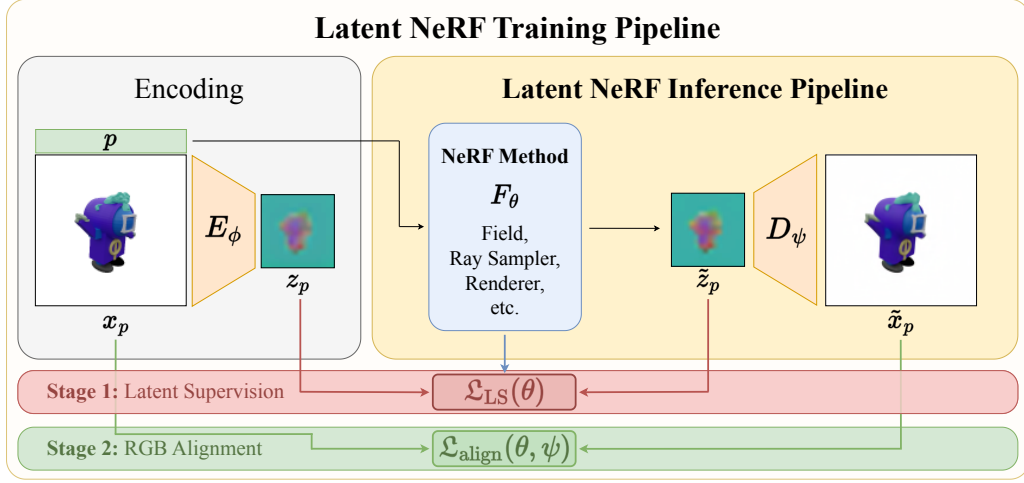

Figure 3: **Latent NeRF Training.** We train a Latent NeRF in two stages. First, we train the chosen NeRF method  $F_\theta$  on posed encoded latent images using its proprietary loss  $\mathcal{L}_{F_\theta}$  that matches rendered latents  $\tilde{z}_p$  and encoded latents  $z_p$ . Subsequently, we align with the scene in the RGB space by adding decoder fine-tuning via  $\mathcal{L}_{\text{align}}$  that matches ground truth images  $x_p$  and decoded renderings  $\tilde{x}_p$ .

### 3.1 DEFINITION

Latent NeRFs are conceptually similar to standard NeRFs, with the primary difference being that they model scenes in the latent space of an autoencoder as opposed to the RGB space. As such, latent NeRFs are simple extensions of standard NeRF methods, where the rendering resolution and the number of output channels are modified in accordance with the latent space dimensions. Let  $F_\theta$  be a latent NeRF method with trainable parameters  $\theta$ , where  $F_\theta \in \{\text{Vanilla-NeRF (Mildenhall et al., 2020), Instant-NGP (Müller et al., 2022), TensorRF (Chen et al., 2022), K-Planes (Fridovich-Keil et al., 2023)}\}$ . For conciseness, we consider  $F_\theta$  to be a generic NeRF method and abstract from method-specific nuances. Given a camera pose  $p$ , one can render a novel view as such:

$$\tilde{z}_p = F_\theta(p), \quad \tilde{x}_p = D_\psi(\tilde{z}_p), \quad (1)$$

where  $\tilde{z}_p$  is the rendered latent image of shape  $(h, w, c)$ , and  $\tilde{x}_p$  is the decoded RGB image of shape  $(H, W, 3)$ . We define  $l > 1$  as the resolution downscale factor when going from the RGB space to the latent space:  $(h, w) = (H/l, W/l)$ . As NeRF rendering pipelines implement classic volume rendering (Kajiya & Von Herzen, 1984) where pixels are independently rendered, latent NeRFs reduce the rendering complexity by a factor of  $l^2$  as compared to standard NeRFs. This makes latent NeRFs highly attractive, as they alleviate a key bottleneck in NeRF training, while maintaining the same target resolution after decoding.

### 3.2 TRAINING

Our latent NeRF training scheme consists of two stages, as illustrated in Fig. 3.

**Latent Supervision.** In this stage, we consider the direct adaptation of NeRF training in the latent space, i.e. training NeRF on latent image representations rather than RGB images. Let  $\mathcal{L}_{F_\theta}$  be the training loss corresponding to the NeRF method  $F_\theta$ .  $\mathcal{L}_{F_\theta}$  comprises of a pixel-level reconstructive objective that matches the NeRF renderings to ground truth views, as well as other method-specific regularization terms. Latent Supervision consists of minimizing the following objective:

$$\mathcal{L}_{\text{LS}}(\theta) = \sum_{p \in \mathcal{P}} \mathcal{L}_{F_\theta}(\theta; z_p, \tilde{z}_p), \quad (2)$$

where  $z_p$  and  $\tilde{z}_p$  are respectively the encoded latent representation of the RGB ground truth and the rendered latent image, with pose  $p$ .  $\mathcal{P}$  denotes the set of training camera poses. Note that, to avoid redundantly encoding training views, we start this stage by encoding all the training images  $\mathcal{X} = \{x_p\}_{p \in \mathcal{P}}$  into latent image representations  $\mathcal{Z} = \{z_p\}_{p \in \mathcal{P}}$ , and then caching them.

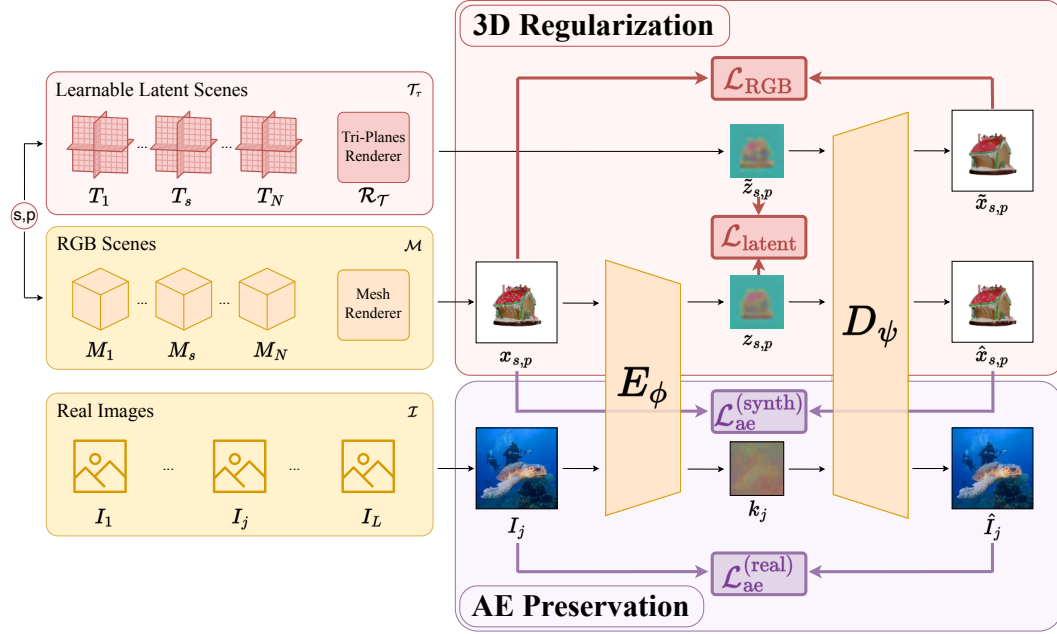

Figure 4: **IG-AE Training.** We jointly learn a set of latent synthetic scenes  $\mathcal{T}_\tau$  and supervise the latent images  $z_{s,p}$  of an autoencoder with rendered 3D-consistent latents  $\tilde{z}_{s,p}$  using  $\mathcal{L}_{\text{latent}}$ . We match decoded latent renderings  $\tilde{x}_{s,p}$  with the ground truth scene renderings  $x_{s,p}$  using  $\mathcal{L}_{\text{RGB}}$ . We preserve autoencoder performances on synthetic and real data respectively through  $\mathcal{L}_{\text{ae}}^{(\text{synth})}$  and  $\mathcal{L}_{\text{ae}}^{(\text{real})}$ .

**RGB alignment.** While Latent Supervision effectively captures a 3D structure in the latent space, even minor inaccuracies in latent NeRF renderings can be magnified during the decoding process. These inaccuracies stem from various sources of error within the pipeline, mainly: errors originating from the latent space and autoencoding performances (i.e. imperfect AE), and errors associated with 3D modeling (i.e. imperfect NeRF). Hence, in order to alleviate the effect of these errors, we finish our latent NeRF training by an RGB alignment process, where we fine-tune the decoder  $D_\psi$  and the latent scene  $F_\theta$  to align with the RGB space. In practice, we minimize the following objective:

$$\mathcal{L}_{\text{align}}(\theta, \psi) = \sum_{p \in \mathcal{P}} \|x_p - \tilde{x}_p\|_2^2, \quad (3)$$

where  $x_p$  is the RGB ground truth, and  $\tilde{x}_p = D_\psi(\tilde{z}_p)$  is the decoded latent NeRF rendering. Consequently, the latent NeRF not only exhibits good NVS performances in the latent space, but also when decoding its renderings to the RGB space.

**Overall,** we divide latent NeRF training into Latent Supervision and RGB Alignment. Latent Supervision is an accelerated approach that learns 3D structures in the latent space thanks to reduced image resolutions, and RGB alignment enhances NVS quality in the RGB space by using RGB supervision and a decoder fine-tuning, while still rendering the NeRF in the latent space. Fig. 2 (AE columns) illustrates the results of our latent NeRF training method when applied in a standard latent space. Latent NeRFs trained in a standard latent space with our method learn a coarse geometry. However, due to the aforementioned incompatibilities between latent spaces and NeRFs, the decoded renderings present artifacts in the RGB space. To address this, we shift focus to resolving these incompatibilities in the next section, and present an inverse graphics autoencoder embedding a 3D-aware latent that is compatible with learning latent NeRFs.

## 4 INVERSE GRAPHICS AUTOENCODER

We present IG-AE, an autoencoder that encodes 3D-consistent images into 3D-consistent latent representations. To attain such an autoencoder, it is necessary that its latent space encodes the



RGB space while also retaining an underlying 3D geometry. In this section, we start by defining 3D-consistency (Section 4.1), and then elaborate on how we train an IG-AE: we utilize synthetic data to construct a learnable set of latent scenes which aims to supervise the latent space of an AE with 3D-consistent latents (Section 4.2), all while preserving autoencoding performances (Section 4.3). Fig. 4 presents an overview of our method.

#### 4.1 3D-CONSISTENCY

The notion of 3D consistency ensures that corresponding points or features in different images represent the same point or object in the scene, despite variations in viewpoint, lighting or occlusion. We denote the posed images as  $\mathcal{X} = \{x_p \mid p \in \text{SE}(3)\}$ , where  $\text{SE}(3)$  is the Special Euclidean group containing all camera poses in 3D.  $\mathcal{X}$  are posed 3D-consistent images if and only if there exists a 3D model  $M$  such that:

$$\forall p \in \text{SE}(3), \text{Render}(M, p) = x_p. \quad (4)$$

Note that a NeRF model inherently produces 3D-consistent images as it is an implicit model  $M$  rendered via classic volume rendering (Kajiya & Von Herzen, 1984). Also note that while 3D consistency is natural for posed images  $\mathcal{X} = \{x_p\}_{p \in \mathcal{P}}$  obtained from a scene in the image space, it does not naturally extend to the latent space, as latent representations of two 3D-consistent images are not necessarily 3D consistent. Our 3D-aware latent space is designed to mitigate this discrepancy.

#### 4.2 3D-REGULARIZATION

To achieve 3D-consistency in the latent space, we learn an IG-AE by aligning the latent encodings of 3D-consistent images with reference 3D-consistent latent images. However, this cannot be directly achieved as such 3D-consistent latent images are not available. To this end, we learn a set of 3D latent scenes with NeRFs from which 3D-consistent latents can be easily rendered. In fact, while NeRFs cannot replicate 3D-inconsistent latents from a given autoencoder, training them via  $\mathcal{L}_{F_\theta}$  (which typically employs an MSE reconstructive objective) leads to a convergence towards a common coarse geometry that most satisfies the inputs, while maintaining 3D-consistency. We utilize this property in our approach to obtain 3D-consistent latent images with which we supervise our autoencoder. To learn our latent scenes in practice, we adopt Tri-Plane representations (Chan et al., 2022), as their simple architecture ensures a low memory footprint and a fast training.

Let  $\mathcal{M} = \{M_1, \dots, M_N\}$  be a dataset of 3D scenes, and  $\mathcal{X}_s = \{x_{s,p}\}_{p \in \mathcal{P}}$  be the set of renderings of a scene  $M_s \in \mathcal{M}$  from an array of training views  $\mathcal{P}$ . We denote the set of latent scenes as the set of Tri-Planes  $\mathcal{T}_\tau = \{T_1, \dots, T_N\}$ , where  $\tau$  comprises both scene-specific trainable parameters, as well as shared parameters present in the feature decoder of our common Tri-Plane renderer  $\mathcal{R}_\tau$ .

Before training our IG-AE, we start by encoding views of our scenes  $\mathcal{M}$  into standard (i.e. 3D-inconsistent) latent views, and training our Tri-Planes on these latents. Subsequently, we proceed to train our IG-AE while continuing to jointly train our Tri-Planes. For each scene  $M_s$ , we encode each view  $x_{s,p}$  into a latent image  $z_{s,p}$ , and render the corresponding 3D-aware latent image  $\tilde{z}_{s,p}$  from the latent scene  $T_s$  as follows:

$$z_{s,p} = E_\phi(x_{s,p}), \quad \tilde{z}_{s,p} = \mathcal{R}_\tau(T_s, p), \quad (5)$$

where  $E_\phi$  is the encoder with trainable parameters  $\phi$ . We then define a loss function  $\mathcal{L}_{\text{latent}}$  that aligns these latent representations:

$$\mathcal{L}_{\text{latent}}(\phi, \tau; z_{s,p}, \tilde{z}_{s,p}) = \|z_{s,p} - \tilde{z}_{s,p}\|_2^2. \quad (6)$$

This loss function updates both the encoder parameters  $\phi$  and the latent scene parameters  $\tau$  to minimize the distance between the latent representations. This means that, on the one hand, the latent scene  $T_s$  is updated to align with the 3D-inconsistent latent images  $z_{s,p}$ , and hence learn a coarse geometry common among all latent images of  $M_s$ . On the other hand, the encoder parameters  $\phi$  are updated to produce latent images that more closely reassemble the latent scene renderings  $\tilde{z}_{s,p}$ , or in other words, produce 3D-consistent images.

We additionally define  $\mathcal{L}_{\text{RGB}}$  as a loss function that mirrors  $\mathcal{L}_{\text{latent}}$  in the RGB space:

$$\mathcal{L}_{\text{RGB}}(\psi, \tau; x_{s,p}, \tilde{x}_{s,p}) = \|x_{s,p} - \tilde{x}_{s,p}\|_2^2, \quad (7)$$

where  $\tilde{x}_{s,p} = D_\psi(\tilde{z}_{s,p})$  is the decoded latent scene rendering.  $\mathcal{L}_{\text{RGB}}$  updates both the decoder parameters  $\psi$  and the latent scene parameters  $\tau$  so that the latent scene aligns with the RGB scene when decoded. This is to ensure the optimal decoding of 3D-consistent latents as well as NVS performances in the RGB space.

Therefore, our 3D regularization objective minimizes the following loss:

$$\mathcal{L}_{\text{3D}}(\phi, \psi, \tau) = \sum_{s,p} [\lambda_{\text{latent}} \mathcal{L}_{\text{latent}}(\phi, \tau; z_{s,p}, \tilde{z}_{s,p}) + \lambda_{\text{RGB}} \mathcal{L}_{\text{RGB}}(\psi, \tau; x_{s,p}, \tilde{x}_{s,p})], \quad (8)$$

where  $\lambda_{\text{latent}}$  and  $\lambda_{\text{RGB}}$  are hyper-parameters.

**Overall**, our IG-AE is trained by aligning the latent space of an autoencoder with the space of latent images that is inferable via Tri-Planes, while also ensuring the proper mapping from the latent space to the RGB space. In practice, we use synthetic scenes from Objaverse (Deitke et al., 2023) to learn 3D structure in the latent space, as they present well-defined geometry and error-free camera parameters. Fig. 2 illustrates a comparison between a standard AE latent space and our 3D-aware latent space. While latent NeRFs trained with an AE present artifacts when decoding their renderings, those trained in the latent space of our IG-AE do not exhibit such artifacts. Yet, our experiments show that solely applying our 3D-regularization optimization objective leads to a degradation of the AE’s generalization capabilities and autoencoding performances. On that account, we present in the next section additional components of our training that target a reconstructive objective.

#### 4.3 AUTOENCODER PRESERVATION

As 3D regularization does not incorporate autoencoder reconstruction, this section focuses on preserving the autoencoding performance of the AE on both synthetic and real data. To this end, we additionally jointly learn a reconstructive objective. First, we add an autoencoder loss to align the ground truth RGB views with the reconstructed views after encoding and decoding:

$$\mathcal{L}_{\text{ae}}^{(\text{synth})}(\phi, \psi; x_{s,p}, \hat{x}_{s,p}) = \|x_{s,p} - \hat{x}_{s,p}\|_2^2, \quad (9)$$

where  $\hat{x}_{s,p} = D_\psi(z_{s,p})$  is the reconstruction of the ground truth image. This ensures that the autoencoder still reconstructs images from the scenes.

To avoid overfitting on synthetic data, we additionally inject real images from Imagenet (Deng et al., 2009) into our training pipeline, on which we also define a reconstructive objective. We denote  $\mathcal{I} = \{I_1, \dots, I_L\}$  the dataset of real images. We define the reconstructive loss on an image  $I_j \in \mathcal{I}$  as follows:

$$\mathcal{L}_{\text{ae}}^{(\text{real})}(\phi, \psi; I_j, \hat{I}_j) = \|I_j - \hat{I}_j\|_2^2 + \lambda_p \mathcal{L}_p(I_j, \hat{I}_j) + \lambda_{\text{TV}} \mathcal{L}_{\text{TV}}(k_j), \quad (10)$$

where  $\lambda_p$  and  $\lambda_{\text{TV}}$  are hyper-parameters,  $\hat{I}_j = D_\psi(k_j)$  is the reconstruction of  $I_j$ , and  $k_j = E_\phi(I_j)$  is the encoding of  $I_j$ .  $\mathcal{L}_p$  is a perceptual loss that refines the autoencoder reconstructions by aligning the reconstructed and original images in the feature space of a pre-trained network.  $\mathcal{L}_{\text{TV}}$  is a total variation loss that acts as a regularization term to encourage spatial smoothness by penalizing high-frequency variations in the latent images. We found that it leads to latent images that more closely reassemble our 3D-consistent latents. More details about TV are present in Appendix A. This is done to prevent the IG-AE from converging towards a dual-mode solution, where it is only 3D-consistent for synthetic scenes while functioning as a normal AE for real scenes.

Therefore, our autoencoder preservation loss is defined as follows:

$$\mathcal{L}_{\text{ae}}(\phi, \psi) = \lambda_{\text{ae}}^{(\text{synth})} \sum_{s,p} \mathcal{L}_{\text{ae}}^{(\text{synth})}(\phi, \psi; x_{s,p}, \hat{x}_{s,p}) + \lambda_{\text{ae}}^{(\text{real})} \sum_j \mathcal{L}_{\text{ae}}^{(\text{real})}(\phi, \psi; I_j, \hat{I}_j), \quad (11)$$

where  $\lambda_{\text{ae}}^{(\text{synth})}$  and  $\lambda_{\text{ae}}^{(\text{real})}$  are hyper-parameters.

#### 4.4 IG-AE TRAINING OBJECTIVE

Overall, we present a joint training objective for our IG-AE that regularizes its latent space with 3D geometry while preserving its autoencoding performances. Our IG-AE training objective minimizes the following loss:

$$\mathcal{L}_{\text{IG-AE}}(\phi, \psi, \tau) = \mathcal{L}_{\text{3D}}(\phi, \psi, \tau) + \mathcal{L}_{\text{ae}}(\phi, \psi). \quad (12)$$

In summary, our training strategy exploits the well-defined geometry of synthetic data and utilizes  $\mathcal{L}_{3D}$  to learn latent scenes and regularize the latent space of an AE with 3D geometry, all while maintaining the reconstruction performance of the AE via  $\mathcal{L}_{ae}$  and real data.

## 5 EXPERIMENTS

We evaluate our method by first training an IG-AE on synthetic scenes from Objaverse, as described in Section 4. Subsequently, we train Nerfstudio models in our 3D-aware latent space on scenes from *out-of-distribution* datasets. We also train Nerfstudio models on held-out scenes from Objaverse (results in Appendix B.3). We compare the novel view synthesis performance of the Nerfstudio models when trained in our 3D-aware latent space (IG-AE), a standard latent space (AE), and the RGB space. Moreover, we evaluate the auto-encoding performances of our IG-AE on held-out real images. Finally, we assess our design choices by presenting an ablation study of our method, where we omit either our 3D-regularization components or our AE preservation components.

### 5.1 NERFSTUDIO EXTENSION

We extend Nerfstudio to support latent scene learning in a code which we include in the supplementary material and will publicly release as open-source. Our extension omits the constraint of training models in the RGB space and allows to train Nerfstudio models in any feature space. Concurrently, we incorporate our latent NeRF training pipeline as well as IG-AE into Nerfstudio while adhering to its coding conventions, thereby enabling the training of any Nerfstudio model in our 3D-aware latent space. We modify the ray batching process to make it correspond to full images, where the default behavior uses randomly sampled pixels. This is necessary to be able to decode the rendered images without breaking the gradient flow. Beyond reproducibility purposes for this paper, we hope the proposed generic extension will facilitate research on latent NeRFs and their applications.

### 5.2 DATASETS

**For 3D-regularization**, we adopt Objaverse (Deitke et al., 2023), a large dataset of diverse synthetic 3D objects. Objaverse provides meshes of synthetic objects, and thus presents no artifact in its scenes and no approximation errors in camera parameters. We utilize  $N = 500$  objects from Objaverse. Each object is rendered from  $V = 300$  views at a  $128 \times 128$  resolution. Each view is rendered from a randomly sampled camera pose on the sphere surrounding the object.

**For AE preservation**, we adopt Imagenet (Deng et al., 2009), a large dataset of diverse real images. We utilize  $L = 40\,000$  images, which we pre-process by doing a square cropping followed by a downscaling to a  $128 \times 128$  resolution that matches our rendered scenes.

**For NeRF evaluations**, we train NeRFs on held-out scenes from Objaverse, and on scenes from three out-of-distribution datasets: Shapenet Hats, Bags, and Vases (Chang et al., 2015). All scenes are rendered with the same resolution and number of views as Objaverse.

### 5.3 TRAINING DETAILS

**IG-AE training details.** We adopt the pre-trained “Ostris KL-f8-d16” VAE (Burkett, 2024) from Hugging Face, which has a downscale factor  $l = 8$ , and  $c = 16$  feature channels in the latent space. We apply a Total Variation (TV) regularization on our Tri-Planes with a factor  $\lambda_{TV}^{3D}$  which prevents overfitting on train views (we exclude it from Eq. (8) for clarity). Analogously, we also apply TV regularization on encoded real images  $k_j$ . A detailed presentation of TV and its benefits for NVS can be found in Appendix A. Training IG-AE takes 60 hours on  $4 \times$  NVIDIA L4 GPUs. Our detailed hyper-parameter settings can be found in Appendix C.1.

**Nerfstudio models training details.** We test the following models from Nerfstudio: Vanilla-NeRF (Mildenhall et al., 2020), Instant-NGP (Müller et al., 2022), TensorRF (Chen et al., 2022), and K-Planes (Fridovich-Keil et al., 2023). For each method, the Nerfstudio framework provides a proprietary loss  $F_\theta$ , as well as a custom training procedure that includes specific optimizers, schedulers and other method-specific components. To train a latent NeRF in Nerfstudio, we first train the chosen model



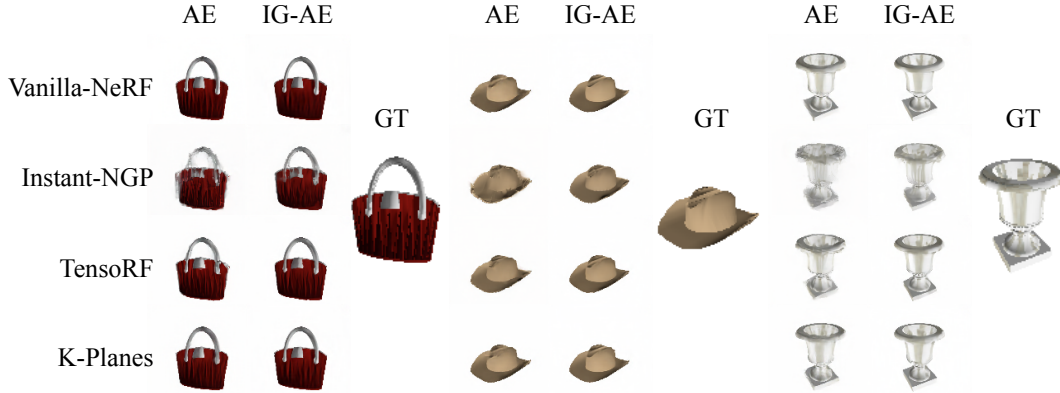

Figure 5: **Qualitative results.** Visualization of decoded latent NeRF renderings trained with a standard AE and an IG-AE on scenes from three *out-of-distribution* datasets. Latent NeRFs trained with an AE exhibit artifacts in decoded renderings that are not present in those trained with IG-AE.

Table 1: **Main Results on ShapeNet datasets.** All results are obtained by training NeRF models in Nerfstudio using our Latent NeRF Training Pipeline, and are averaged over 4 scenes from each dataset. Our 3D-aware latent space generalizes to *out-of-distribution* datasets and is more suited for latent NeRF training.

|              |       | Bags dataset |              |              | Hats dataset |              |              | Vases dataset |              |              |
|--------------|-------|--------------|--------------|--------------|--------------|--------------|--------------|---------------|--------------|--------------|
|              |       | PSNR         | SSIM         | LPIPS        | PSNR         | SSIM         | LPIPS        | PSNR          | SSIM         | LPIPS        |
| Vanilla-NeRF | AE    | 28.81        | 0.954        | 0.046        | 28.75        | 0.960        | <b>0.032</b> | 32.00         | 0.968        | 0.023        |
|              | IG-AE | <b>29.57</b> | <b>0.960</b> | <b>0.044</b> | <b>29.31</b> | <b>0.967</b> | 0.033        | <b>33.06</b>  | <b>0.973</b> | <b>0.021</b> |
| Instant-NGP  | AE    | 24.29        | 0.892        | 0.113        | 23.48        | 0.893        | 0.096        | 26.49         | 0.917        | 0.081        |
|              | IG-AE | <b>25.90</b> | <b>0.923</b> | <b>0.062</b> | <b>25.30</b> | <b>0.925</b> | <b>0.048</b> | <b>28.44</b>  | <b>0.942</b> | <b>0.043</b> |
| TensoRF      | AE    | 26.19        | 0.930        | 0.060        | 25.90        | 0.932        | 0.044        | 29.16         | 0.948        | 0.038        |
|              | IG-AE | <b>28.40</b> | <b>0.953</b> | <b>0.038</b> | <b>28.09</b> | <b>0.957</b> | <b>0.029</b> | <b>31.45</b>  | <b>0.966</b> | <b>0.021</b> |
| K-Planes     | AE    | 28.00        | 0.946        | 0.041        | 27.68        | 0.951        | 0.031        | 31.56         | 0.964        | 0.023        |
|              | IG-AE | <b>29.22</b> | <b>0.957</b> | <b>0.038</b> | <b>28.81</b> | <b>0.962</b> | <b>0.027</b> | <b>32.79</b>  | <b>0.971</b> | <b>0.019</b> |

for 10 000 iterations to minimize  $\mathcal{L}_{LS}$  using the method-specific optimization process. Subsequently, we continue the training with 15 000 iterations of RGB alignment by minimizing  $\mathcal{L}_{align}$ . To account for the change of image representations, we modulate the learning rate of each method by a factor of  $\xi_{LS}$  in latent supervision, and a factor  $\xi_{align}$  for RGB alignment. Appendix C.2 details the hyper-parameters we used in Nerfstudio, including the values of these factors for each method.

#### 5.4 RESULTS

We report for each experiment the Peak Signal-to-Noise Ratio (PSNR  $\uparrow$ ) for pixel-level similarity, the Structural Similarity Index Measure (SSIM  $\uparrow$ ) for structural-level similarity, and the Learned Perceptual Image Patch Similarity (Zhang et al., 2018, LPIPS  $\downarrow$ ) for perceptual similarity. Quantitative and qualitative results can be found in Table 1 and Fig. 5, where we utilize our latent NeRF training pipeline to train various Nerfstudio models on out-of-distribution datasets from ShapeNet, both using our IG-AE and a standard AE. As illustrated, models trained with our IG-AE showcase a superior NVS performance compared to those trained with a standard AE. This proves that our IG-AE embeds a 3D-aware latent space that is more compatible with NeRF training than a standard latent space, and that is able to generalize to novel datasets.

Appendix B.1 presents the evolution of the NVS performance throughout our two Latent NeRF training stages. In Appendix B.2, we provide a comparison of latent NeRF training with classical RGB training. Latent NeRF training showcases significant speedups both in terms of training and rendering times, but lower NVS performance. This is due to a limitation in the representation of high frequencies when decoding latent NeRF renderings, as it can be seen in Fig. 5. We leave this to future

Table 2: **Ablations.** A comparison between our proposed IG-AE and the baseline autoencoder (AE) on two tasks. First, we compare their NVS performances when used to train a latent Vanilla-NeRF. Second, we compare their reconstruction performances when auto-encoding held-out images from ImageNet. Our method presents both strong NVS and reconstruction performances as compared to its ablations, thus validating our design choices. The **bold** and underlined entries respectively indicate the best and second-best results.

|               | NVS          |              |              |              |              |              | Reconstruction |              |              |
|---------------|--------------|--------------|--------------|--------------|--------------|--------------|----------------|--------------|--------------|
|               | Cake         |              |              | Figurine     |              |              |                |              |              |
|               | PSNR         | SSIM         | LPIPS        | PSNR         | SSIM         | LPIPS        | PSNR           | SSIM         | LPIPS        |
| AE            | 33.18        | <u>0.962</u> | 0.053        | 31.46        | 0.972        | <u>0.017</u> | 27.69          | 0.856        | 0.023        |
| IG-AE (no 3D) | 32.09        | 0.951        | 0.063        | 30.94        | 0.965        | 0.021        | <b>29.83</b>   | <b>0.898</b> | <b>0.013</b> |
| IG-AE (no Pr) | <u>33.87</u> | <b>0.966</b> | <b>0.050</b> | <b>33.73</b> | <b>0.982</b> | <b>0.012</b> | 17.66          | 0.410        | 0.279        |
| IG-AE         | <b>34.38</b> | <b>0.966</b> | <u>0.051</u> | <u>33.17</u> | <u>0.979</u> | <b>0.012</b> | <u>29.57</u>   | <u>0.887</u> | <u>0.015</u> |

work, as our approach is the first to propose a 3D-aware latent space and to assess its performance with various NeRF architectures.

## 5.5 ABLATIONS

To justify our design choices, we conduct an ablation study in which we alternatively omit our 3D regularization pipeline and our AE preservation components. Ablation results on held-out Objaverse scenes for Vanilla NeRF can be found in Table 2. “**IG-AE (no Pr)**” removes the AE preservation components from our training by deactivating  $\mathcal{L}_{ae}$ . “**IG-AE (no 3D)**” omits our 3D regularization by deactivating  $\mathcal{L}_{3D}$ . As illustrated, IG-AE (no Pr) presents deteriorated autoencoding performance due to overfitting on the task of 3D-regularization. IG-AE (no 3D) showcases good autoencoding performances, but lower NVS performances, as the latent space here is not 3D-aware due to the lack of 3D-regularization. Our method (IG-AE) demonstrates both good NVS and autoencoding reconstruction performances as compared to its ablations, thereby justifying the components of our pipeline. Note that ablating both our 3D regularization components and our AE preservation components leads back to the case of a standard autoencoder (AE). Additional ablations done with other NeRF models can be found in Table 4 in Appendix B.2.

## 6 CONCLUSION

In this paper, we introduce 3D-aware latent spaces and propose IG-AE, an autoencoder compatible with latent NeRF training. Moreover, we present a latent NeRF training pipeline that brings NeRF architectures to the latent space. We integrate our pipeline into an open-source extension of Nerfstudio, thereby enabling latent NeRF training for its supported architectures. Extensive experiments show the notable improvements our 3D-aware latent space brings as compared to training NeRFs in a standard latent space, as well as the efficiency improvements it brings with respect to training NeRFs in the RGB space. In concluding this paper, several directions of future work arise, as we consider this work to the first milestone towards foundation inverse graphics autoencoders. This includes, for instance, the exploration of approaches improving the representation of high-frequency details when decoding latent NeRFs. We hope that our proposed Nerfstudio extension, as well as our open-source codebase, will promote further research in this of direction. In a separate contribution, Anonymous (2024) propose a novel method tackling “scaled inverse graphics”, in which our 3D-aware latent space serves as a key component.

## REFERENCES

Anonymous. Scaled Inverse Graphics: Efficiently Learning Large Sets of 3D Scenes. In *ICLR 2025 submissions (submission number: 7354)*, 2024. This paper can also be found in a .pdf format in the supplementary material of our submission.

- Tristan Aumentado-Armstrong, Ashkan Mirzaei, Marcus A Brubaker, Jonathan Kelly, Alex Levinshstein, Konstantinos G Derpanis, and Igor Gilitschenski. Reconstructive Latent-Space Neural Radiance Fields for Efficient 3D Scene Representations. *arXiv preprint arXiv:2310.17880*, 2023.
- Jonathan T. Barron, Ben Mildenhall, Matthew Tancik, Peter Hedman, Ricardo Martin-Brualla, and Pratul P. Srinivasan. Mip-NeRF: A Multiscale Representation for Anti-Aliasing Neural Radiance Fields. In *Proceedings of the IEEE/CVF International Conference on Computer Vision (ICCV)*, pp. 5855–5864, October 2021.
- Jaret Burkett. Ostris VAE - KL-f8-d16. <https://huggingface.co/ostris/vae-kl-f8-d16>, 2024. Accessed: 2024-09-25.
- Eric R. Chan, Connor Z. Lin, Matthew A. Chan, Koki Nagano, Boxiao Pan, Shalini De Mello, Orazio Gallo, Leonidas J. Guibas, Jonathan Tremblay, Sameh Khamis, Tero Karras, and Gordon Wetzstein. Efficient Geometry-Aware 3D Generative Adversarial Networks. In *Proceedings of the IEEE/CVF Conference on Computer Vision and Pattern Recognition (CVPR)*, pp. 16123–16133, June 2022.
- Angel X. Chang, Thomas Funkhouser, Leonidas Guibas, Pat Hanrahan, Qixing Huang, Zimo Li, Silvio Savarese, Manolis Savva, Shuran Song, Hao Su, et al. ShapeNet: An Information-Rich 3D Model Repository. *arXiv preprint arXiv:1512.03012*, 2015.
- Anpei Chen, Zexiang Xu, Andreas Geiger, Jingyi Yu, and Hao Su. TensorRF: Tensorial Radiance Fields. In *European Conference on Computer Vision (ECCV)*, 2022.
- Matt Deitke, Dustin Schwenk, Jordi Salvador, Luca Weihs, Oscar Michel, Eli VanderBilt, Ludwig Schmidt, Kiana Ehsani, Aniruddha Kembhavi, and Ali Farhadi. Objaverse: A Universe of Annotated 3D Objects. In *Proceedings of the IEEE/CVF Conference on Computer Vision and Pattern Recognition (CVPR)*, pp. 13142–13153, June 2023.
- Jia Deng, Wei Dong, Richard Socher, Li-Jia Li, Kai Li, and Li Fei-Fei. ImageNet: A Large-Scale Hierarchical Image Database. In *2009 IEEE conference on computer vision and pattern recognition*, pp. 248–255. Ieee, 2009.
- Patrick Esser, Robin Rombach, and Bjorn Ommer. Taming Transformers for High-Resolution Image Synthesis. In *Proceedings of the IEEE/CVF Conference on Computer Vision and Pattern Recognition (CVPR)*, pp. 12873–12883, June 2021.
- Sara Fridovich-Keil, Alex Yu, Matthew Tancik, Qinhong Chen, Benjamin Recht, and Angjoo Kanazawa. Plenoxels: Radiance Fields Without Neural Networks. In *Proceedings of the IEEE/CVF Conference on Computer Vision and Pattern Recognition (CVPR)*, pp. 5501–5510, June 2022.
- Sara Fridovich-Keil, Giacomo Meanti, Frederik Rahbæk Warburg, Benjamin Recht, and Angjoo Kanazawa. K-Planes: Explicit Radiance Fields in Space, Time, and Appearance. In *Proceedings of the IEEE/CVF Conference on Computer Vision and Pattern Recognition (CVPR)*, pp. 12479–12488, June 2023.
- James T. Kajiya and Brian P. Von Herzen. Ray Tracing Volume Densities. *SIGGRAPH Comput. Graph.*, 18(3):165–174, January 1984. doi: 10.1145/964965.808594.
- Bernhard Kerbl, Georgios Kopanas, Thomas Leimkühler, and George Drettakis. 3D Gaussian Splatting for Real-Time Radiance Field Rendering. *ACM Transactions on Graphics*, 42(4), July 2023.
- Umar Khalid, Hasan Iqbal, Nazmul Karim, Jing Hua, and Chen Chen. LatentEditor: Text Driven Local Editing of 3D Scenes. *arXiv preprint arXiv:2312.09313*, 2023.
- Sosuke Kobayashi, Eiichi Matsumoto, and Vincent Sitzmann. Decomposing NeRF for Editing via Feature Field Distillation. In S. Koyejo, S. Mohamed, A. Agarwal, D. Belgrave, K. Cho, and A. Oh (eds.), *Advances in Neural Information Processing Systems*, volume 35, pp. 23311–23330. Curran Associates, Inc., 2022.
- Jonathan Long, Evan Shelhamer, and Trevor Darrell. Fully Convolutional Networks for Semantic Segmentation. In *Proceedings of the IEEE Conference on Computer Vision and Pattern Recognition (CVPR)*, June 2015.

- Ricardo Martin-Brualla, Noha Radwan, Mehdi S. M. Sajjadi, Jonathan T. Barron, Alexey Dosovitskiy, and Daniel Duckworth. NeRF in the Wild: Neural Radiance Fields for Unconstrained Photo Collections. In *Proceedings of the IEEE/CVF Conference on Computer Vision and Pattern Recognition (CVPR)*, pp. 7210–7219, June 2021.
- Gal Metzer, Elad Richardson, Or Patashnik, Raja Giryes, and Daniel Cohen-Or. Latent-NeRF for Shape-Guided Generation of 3D Shapes and Textures. In *Proceedings of the IEEE/CVF Conference on Computer Vision and Pattern Recognition (CVPR)*, pp. 12663–12673, June 2023.
- Ben Mildenhall, Pratul P. Srinivasan, Matthew Tancik, Jonathan T. Barron, Ravi Ramamoorthi, and Ren Ng. NeRF: Representing Scenes as Neural Radiance Fields for View Synthesis. In *ECCV*, 2020.
- Thomas Müller, Alex Evans, Christoph Schied, and Alexander Keller. Instant Neural Graphics Primitives with a Multiresolution Hash Encoding. *ACM Trans. Graph.*, 41(4):102:1–102:15, July 2022. doi: 10.1145/3528223.3530127.
- Toshiaki Ohgushi, Kenji Horiguchi, and Masao Yamanaka. Road Obstacle Detection Method Based on an Autoencoder with Semantic Segmentation. In *Proceedings of the Asian Conference on Computer Vision (ACCV)*, November 2020.
- JangHo Park, Gihyun Kwon, and Jong Chul Ye. ED-NeRF: Efficient Text-Guided Editing of 3D Scene With Latent Space NeRF. In *The Twelfth International Conference on Learning Representations*, 2024.
- Adam Paszke, Sam Gross, Francisco Massa, Adam Lerer, James Bradbury, Gregory Chanan, Trevor Killeen, Zeming Lin, Natalia Gimelshein, Luca Antiga, Alban Desmaison, Andreas Kopf, Edward Yang, Zachary DeVito, Martin Raison, Alykhan Tejani, Sasank Chilamkurthy, Benoit Steiner, Lu Fang, Junjie Bai, and Soumith Chintala. PyTorch: An Imperative Style, High-Performance Deep Learning Library. In H. Wallach, H. Larochelle, A. Beygelzimer, F. d’Alché-Buc, E. Fox, and R. Garnett (eds.), *Advances in Neural Information Processing Systems*, volume 32. Curran Associates, Inc., 2019.
- Aditya Ramesh, Mikhail Pavlov, Gabriel Goh, Scott Gray, Chelsea Voss, Alec Radford, Mark Chen, and Ilya Sutskever. Zero-Shot Text-to-Image Generation. In Marina Meila and Tong Zhang (eds.), *Proceedings of the 38th International Conference on Machine Learning*, volume 139 of *Proceedings of Machine Learning Research*, pp. 8821–8831. PMLR, 18–24 Jul 2021.
- Robin Rombach, Andreas Blattmann, Dominik Lorenz, Patrick Esser, and Björn Ommer. High-Resolution Image Synthesis With Latent Diffusion Models. In *Proceedings of the IEEE/CVF Conference on Computer Vision and Pattern Recognition (CVPR)*, pp. 10684–10695, June 2022.
- Leonid I. Rudin, Stanley Osher, and Emad Fatemi. Nonlinear Total Variation Based Noise Removal Algorithms. *Physica D: Nonlinear Phenomena*, 60(1):259–268, 1992. ISSN 0167-2789. doi: [https://doi.org/10.1016/0167-2789\(92\)90242-F](https://doi.org/10.1016/0167-2789(92)90242-F).
- Matthew Tancik, Ethan Weber, Evonne Ng, Ruilong Li, Brent Yi, Justin Kerr, Terrance Wang, Alexander Kristoffersen, Jake Austin, Kamyar Salahi, Abhik Ahuja, David McAllister, and Angjoo Kanazawa. Nerfstudio: A Modular Framework for Neural Radiance Field Development. In *ACM SIGGRAPH 2023 Conference Proceedings*, SIGGRAPH ’23, 2023.
- V. Tschernezki, I. Laina, D. Larlus, and A. Vedaldi. Neural Feature Fusion Fields: 3D Distillation of Self-Supervised 2D Image Representations. In *2022 International Conference on 3D Vision (3DV)*, pp. 443–453, Los Alamitos, CA, USA, sep 2022. IEEE Computer Society. doi: 10.1109/3DV57658.2022.00056.
- Alex Yu, Vickie Ye, Matthew Tancik, and Angjoo Kanazawa. pixelNeRF: Neural Radiance Fields From One or Few Images. In *Proceedings of the IEEE/CVF Conference on Computer Vision and Pattern Recognition (CVPR)*, pp. 4578–4587, June 2021.
- Richard Zhang, Phillip Isola, Alexei A. Efros, Eli Shechtman, and Oliver Wang. The Unreasonable Effectiveness of Deep Features as a Perceptual Metric. In *Proceedings of the IEEE Conference on Computer Vision and Pattern Recognition (CVPR)*, June 2018.

## A TRI-PLANE REPRESENTATIONS

Tri-Plane representations (Chan et al., 2022) are explicit-implicit scene representations enabling scene modeling in three axis-aligned orthogonal feature planes, each of resolution  $K \times K$  with feature dimension  $F$ . To query a 3D point  $x \in \mathbb{R}^3$ , it is projected onto each of the three planes to retrieve bilinearly interpolated feature vectors  $F_{xy}$ ,  $F_{xz}$  and  $F_{yz}$ . These feature vectors are then aggregated via summation and passed into a small neural network to retrieve the corresponding color and density, which are then used for volume rendering (Kajiya & Von Herzen, 1984). We adopt Tri-Plane representations for our set of latent scenes for their lightweight architectures and relatively fast training times.

**TV regularization.** Total variation measures the spatial variation of images. It can act as a regularisation term to denoise images or ensure spatial smoothness. Total variation on images is expressed as follows:

$$\mathcal{L}_{TV}(I) = \frac{1}{HW} \sum_{i,j} [\|I_{i,j} - I_{i-1,j}\|_p^q + \|I_{i,j} - I_{i,j-1}\|_p^q], \quad (13)$$

where  $\|\cdot\|_p^q$  is the  $l_p$  norm to the power  $q$ .

Total variation regularization was adapted for inverse graphics to promote spatial smoothness in implicit-explicit NeRF representation (Fridovich-Keil et al., 2023; 2022; Chen et al., 2022). Accordingly, we regularize our Tri-Planes with total variation, which we write below:

$$\mathcal{L}_{TV}^{3D}(T) = \sum_c \mathcal{L}_{TV}(T^{(c)}), \quad (14)$$

where  $T^{(c)}$  represents the feature plane of index  $c$  in  $T$ . In practice, we add the regularization term  $\lambda_{TV}^{3D} \sum_i \mathcal{L}_{TV}^{3D}(T_i)$  to our 3D regularization loss  $\mathcal{L}_{3D}$  (Eq. (8)), where  $\lambda_{TV}^{3D}$  is a hyperparameter. While this TV regularization is done on plane features, it effectively translates to the latent 3D scene, as latents are obtained from decoding these regularized features. This leads to smooth latent renderings and smooth gradients, as we utilize TV regularization here with  $(p, q) = (2, 2)$ , which discourages high frequency variations in features.

Additionally, we use total variation in our AE preservation loss  $\mathcal{L}_{AE}$  (Eq. (10)) with  $(p, q) = (2, 1)$  to discourage our autoencoder from producing latents with high frequency variations, while conserving sharp edges (Rudin et al., 1992). In fact, we noticed during our experiments that solely using an  $l_2$  reconstructive objective on an autoencoder leads to latents with high frequencies. These high frequencies are inconsistent across latent encodings of the same 3D-consistent object. Hence, to ensure the compatibility of  $\mathcal{L}_{ae}^{(real)}$  with the 3D regularization term  $\mathcal{L}_{3D}$ , we add a TV regularization on encoded latents.

## B SUPPLEMENTARY RESULTS

### B.1 RGB ALIGNMENT VALUE

We show in Table 3 the importance of the second stage of RGB Alignment in the Latent NeRF Training Pipeline, where NVS performances in the RGB space improves after aligning latent scenes with the RGB views.

### B.2 QUANTITATIVE RESULTS

Table 4 includes additional results on held-out scenes from Objaverse. Table 5 compares IG-AE training and RGB training of Nerfstudio methods, in terms of NVS performance as well as training and rendering times.

### B.3 QUALITATIVE RESULTS

Figs. 6 to 8 compares the renderings of NeRFs respectively trained on the Cake, House and Figurine scene from Objaverse using our ablated models as well as our full model. Latent NeRFs trained with



IG-AE (no 3D) present artifacts when decoding their renderings to the RGB space, as the latent space is not 3D-aware. IG-AE (no Pr) and IG-AE both have 3D-aware latent space and present no artifacts, as previously illustrated, IG-AE (no Pr) demonstrates degraded auto-encoding performances.

Fig. 9 illustrates real images that are auto-encoded using all our models.

## C HYPERPARAMETERS

This section is dedicated to illustrate our hyperparameter settings for both our IG-AE training and our Latent NeRF training in Nerfstudio.

### C.1 IG-AE TRAINING SETTINGS

Table 6 details the hyperparameters taken to train our IG-AE.

### C.2 NERFSTUDIO TRAINING SETTINGS

Table 7 details the hyperparameters taken to train NeRF models in Nerfstudio.

Table 3: **RGB alignment value.** We show our NVS performances after latent supervision and RGB Alignment when training NeRF models with IG-AE. NVS has better performances in the RGB space after doing our stage 2 of RGB alignment. All results are obtained on the Cake scene from the Objaverse dataset.

|              | Latent Supervision |       |       | RGB Alignment |       |       |
|--------------|--------------------|-------|-------|---------------|-------|-------|
|              | PSNR               | SSIM  | LPIPS | PSNR          | SSIM  | LPIPS |
| Vanilla-NeRF | 24.34              | 0.870 | 0.175 | 34.68         | 0.967 | 0.050 |
| Instant-NGP  | 22.08              | 0.826 | 0.182 | 28.41         | 0.917 | 0.063 |
| TensorRF     | 24.12              | 0.862 | 0.175 | 33.06         | 0.962 | 0.043 |
| K-Planes     | 22.68              | 0.842 | 0.200 | 33.20         | 0.962 | 0.053 |

Table 4: **Results on Objaverse scenes.** All results are obtained by training the NeRF models using our Latent NeRF Training Pipeline on held-out Objaverse scenes. The IG-AE latent space is more suited for latent NeRF training compared to a standard latent space. This table also extends Table 2 by conducting our ablations on all our adopted representations.

|              |               | Cake  |       |       | House |       |       | Figurine |        |       |
|--------------|---------------|-------|-------|-------|-------|-------|-------|----------|--------|-------|
|              |               | PSNR  | SSIM  | LPIPS | PSNR  | SSIM  | LPIPS | PSNR     | SSIM   | LPIPS |
| Vanilla-NeRF | AE            | 33.18 | 0.962 | 0.053 | 31.71 | 0.946 | 0.031 | 31.46    | 0.972  | 0.017 |
|              | IG-AE (no Pr) | 33.87 | 0.966 | 0.050 | 34.08 | 0.961 | 0.022 | 33.73    | 0.9821 | 0.012 |
|              | IG-AE (no 3D) | 32.09 | 0.951 | 0.063 | 30.56 | 0.923 | 0.046 | 30.94    | 0.9650 | 0.021 |
|              | IG-AE         | 34.68 | 0.967 | 0.050 | 33.10 | 0.954 | 0.027 | 33.10    | 0.979  | 0.013 |
| Instant-NGP  | AE            | 24.69 | 0.860 | 0.122 | 22.67 | 0.784 | 0.196 | 24.62    | 0.908  | 0.086 |
|              | IG-AE (no Pr) | 28.04 | 0.917 | 0.052 | 27.22 | 0.882 | 0.055 | 26.46    | 0.9297 | 0.043 |
|              | IG-AE (no 3D) | 27.17 | 0.904 | 0.087 | 23.34 | 0.805 | 0.189 | 24.48    | 0.9078 | 0.091 |
|              | IG-AE         | 28.41 | 0.917 | 0.063 | 27.04 | 0.882 | 0.064 | 27.20    | 0.941  | 0.040 |
| TensorRF     | AE            | 28.79 | 0.928 | 0.046 | 27.31 | 0.904 | 0.066 | 27.60    | 0.949  | 0.037 |
|              | IG-AE (no Pr) | 34.30 | 0.966 | 0.041 | 32.92 | 0.952 | 0.025 | 32.86    | 0.9780 | 0.012 |
|              | IG-AE (no 3D) | 29.56 | 0.936 | 0.094 | 27.99 | 0.891 | 0.083 | 28.89    | 0.9515 | 0.034 |
|              | IG-AE         | 33.06 | 0.962 | 0.043 | 31.78 | 0.951 | 0.026 | 31.36    | 0.972  | 0.018 |
| K-Planes     | AE            | 31.82 | 0.954 | 0.056 | 30.06 | 0.927 | 0.038 | 30.45    | 0.965  | 0.021 |
|              | IG-AE (no Pr) | 34.75 | 0.966 | 0.049 | 33.22 | 0.949 | 0.026 | 33.67    | 0.9796 | 0.011 |
|              | IG-AE (no 3D) | 29.47 | 0.935 | 0.103 | 29.75 | 0.902 | 0.088 | 30.20    | 0.9602 | 0.027 |
|              | IG-AE         | 33.53 | 0.963 | 0.052 | 31.73 | 0.940 | 0.031 | 32.44    | 0.9751 | 0.014 |

Table 5: **Comparison with RGB training.** Bringing NeRFs to the IG-AE latent space entails significantly lower training and rendering times for most methods. Rendering times represent an average over 1000 image renderings. RGB methods render images at a  $128 \times 128$  resolution, whereas latent methods render at  $16 \times 16$ . Note that for latent NeRF methods, decoding takes an additional 6.7 ms for each method to obtain the final  $128 \times 128$  images. Training and rendering time is measured using a single NVIDIA L4 GPU. As for rendering quality (NVS), some methods are more compatible with training in latent spaces than others, which we see as a direction of future improvements. NVS metrics are averaged over three Objaverse scenes: Cake, House and Figurine.

|              | Training Space | Training Time (min) | Rendering Time (ms) | NVS   |       |       |
|--------------|----------------|---------------------|---------------------|-------|-------|-------|
|              |                |                     |                     | PSNR  | SSIM  | LPIPS |
| Vanilla NeRF | RGB            | 637                 | 1201                | 40.78 | 0.993 | 0.003 |
|              | IG-AE          | 28                  | 19.7                | 33.60 | 0.966 | 0.030 |
| Instant NGP  | RGB            | 6                   | 11.3                | 37.78 | 0.985 | 0.006 |
|              | IG-AE          | 19                  | 7.3                 | 27.47 | 0.913 | 0.056 |
| TensoRF      | RGB            | 92                  | 101.4               | 40.65 | 0.992 | 0.003 |
|              | IG-AE          | 20                  | 10.4                | 32.04 | 0.961 | 0.029 |
| K-Planes     | RGB            | 88                  | 63.3                | 32.98 | 0.964 | 0.027 |
|              | IG-AE          | 29                  | 11.3                | 32.36 | 0.958 | 0.033 |

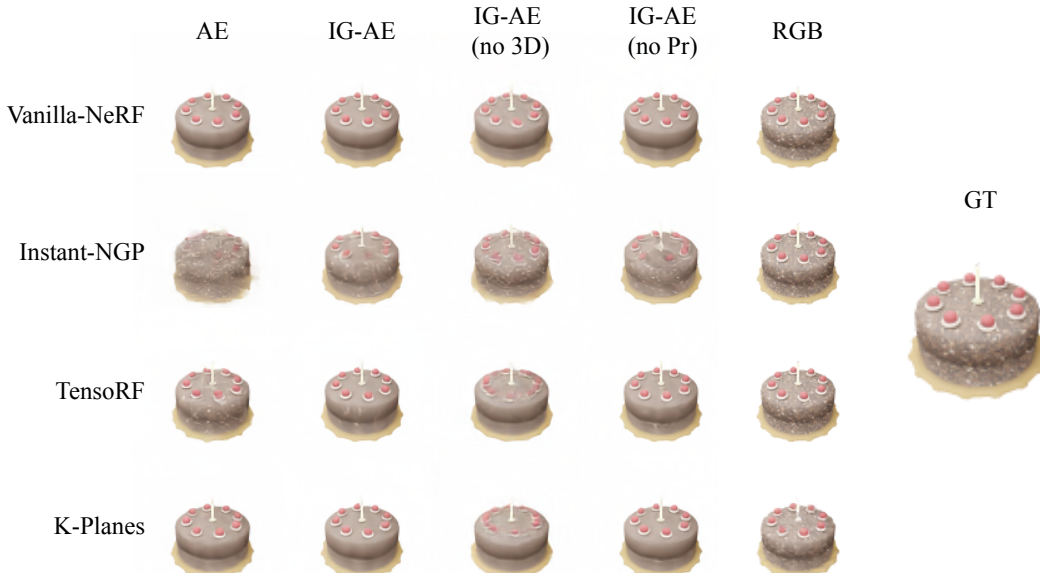

Figure 6: **Qualitative comparison.** NeRF renderings of the Cake scene from Objaverse.

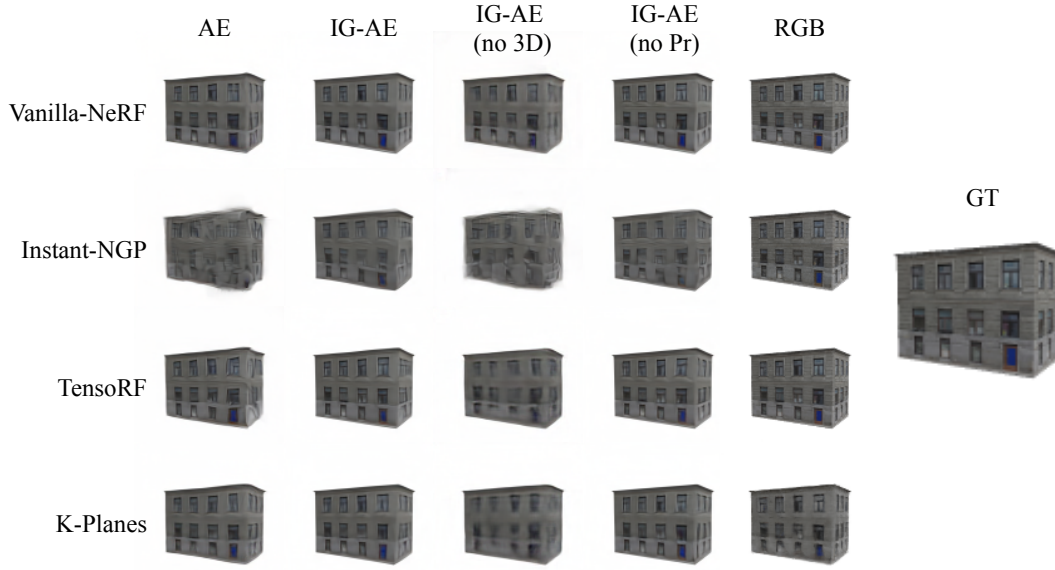

Figure 7: **Qualitative comparison.** NeRF renderings of the House scene from Objaverse.

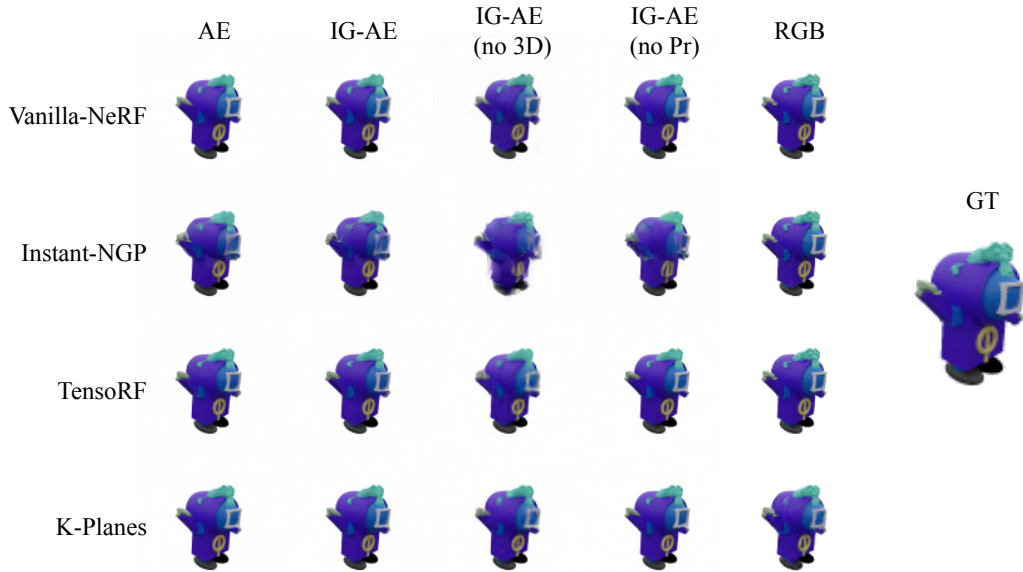

Figure 8: **Qualitative comparison.** NeRF renderings of the Figurine scene from Objaverse.

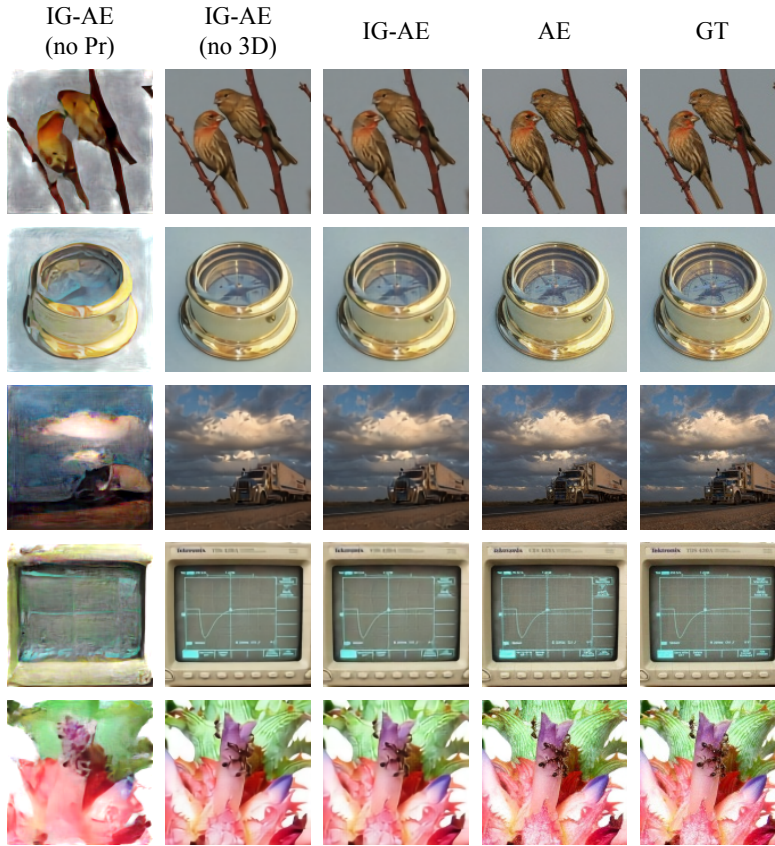

Figure 9: **Qualitative comparison of reconstruction quality when autoencoding.** IG-AE (no Pr) presents artifacts when auto-encoding images. IG-AE (no 3D) omits these artifacts but does not embed a 3D-aware latent space. IG-AE omits the artifacts present in IG-AE (no Pr), while still integrating a 3D-aware latent space.

Table 6: **IG-AE hyperparameters.** Hyperparameters used for our IG-AE training. More detailed information can be found in the configuration files of our open-source code.

| Parameter                              | Value              |
|----------------------------------------|--------------------|
| General                                |                    |
| Number of scenes $N$                   | 500                |
| Pretraining epochs                     | 50                 |
| Training epochs                        | 75                 |
| Loss                                   |                    |
| $\lambda_{\text{latent}}$              | 1                  |
| $\lambda_{\text{RGB}}$                 | 1                  |
| $\lambda_{\text{TV}}^{3\text{D}}$      | $1 \times 10^{-4}$ |
| $\lambda_{\text{ae}}^{(\text{synth})}$ | 0.1                |
| $\lambda_{\text{ae}}^{(\text{real})}$  | 0.1                |
| $\lambda_{\text{p}}$                   | 0.1                |
| $\lambda_{\text{TV}}$                  | $1 \times 10^{-4}$ |
| Optimization                           |                    |
| Optimizer                              | Adam               |
| Batch size (scene views)               | 12                 |
| Batch size (real images)               | 3                  |
| Learning rate (encoder)                | $5 \times 10^{-5}$ |
| Learning rate (decoder)                | $5 \times 10^{-5}$ |
| Learning rate (Tri-Planes)             | $1 \times 10^{-4}$ |
| Scheduler                              | Exponential Decay  |
| Decay factor                           | 0.988              |

Table 7: **Latent NeRF training hyperparameters.** Hyperparameters taken to train our Latent NeRFs in Nerfstudio. More detailed information can be found in the configuration files of our open-source Nerfstudio extension.

| NeRF model   | Parameter                     | Value              |
|--------------|-------------------------------|--------------------|
| Any          | Latent Supervision iterations | 10 000             |
|              | RGB Alignment iterations      | 15 000             |
|              | Batch size                    | 4                  |
|              | NeRF learning rate            | Nerfstudio default |
|              | NeRF optimizer                | Nerfstudio default |
|              | NeRF scheduler                | Nerfstudio default |
|              | Decoder learning rate         | $1 \times 10^{-4}$ |
|              | Decoder optimizer             | Adam               |
|              | Decoder scheduler             | Exponential decay  |
|              | Decoder decay factor          | 0.9996             |
| Vanilla NeRF | $\xi_{\text{LS}}$             | 0.1                |
|              | $\xi_{\text{align}}$          | 1                  |
| Instant-NGP  | $\xi_{\text{LS}}$             | 0.001              |
|              | $\xi_{\text{align}}$          | 0.1                |
| TensorRF     | $\xi_{\text{LS}}$             | 0.01               |
|              | $\xi_{\text{align}}$          | 0.1                |
| K-Planes     | $\xi_{\text{LS}}$             | 0.1                |
|              | $\xi_{\text{align}}$          | 0.1                |
